# Supplementary material
Source: PubMed Central journal article supplement (PMC5824238)
Supplement: jamaoncol-3-906-s002.pdf [file jamaoncol-3-906-s002.pdf]

## Supplementary Online Content

Hortobagyi GN, Van Poznak C, Harker WG, et al. Continued treatment effect of zoledronic acid dosing every 12 vs 4 weeks in women with breast cancer metastatic to bone: the OPTIMIZE-2 randomized clinical trial. *JAMA Oncol*. Published online January 19, 2016. doi:10.1001/jamaoncol.2016.6316

**eMethods.** Additional Details of the Study Methods

**eMaterial.** List of Independent Ethics Committees (IECs) or Institutional Review Boards (IRBs) by Study Center

**eResults.** Additional Details of the Study Results

**eTable 1.** Number of Infusions Before the Study

**eTable 2.** Renal Adverse Events

**eTable 3.** On-treatment Deaths

**eFigure.** Change From Baseline in Bone Biomarker Levels

This supplementary material has been provided by the authors to give readers additional information about their work.

## **eMethods. Additional Details of the Study Methods**

### **History of protocol amendments**

The final protocol was very different from the original protocol due to several major amendments. The first and the second amendment changed the inclusion criteria, allowing patients who were treated at least 9 doses over the prior 10 to 15 months to enter the trial, with no upper limit (was previously 9 to 12 doses over the prior 10 to 12 months); The second amendment removed the placebo arm which was included in the original protocol, and the primary efficacy variable was changed from 'time-to-first Skeletal-Related Events (SRE)' to 'the proportion of patients with at least 1 SRE'. Also, the efficacy comparisons were changed from the original superiority design (zoledronic acid arms versus placebo, and zoledronic acid q4 weeks versus q12 weeks) to the non-inferiority design (zoledronic acid q4 weeks versus q12 weeks). The third amendment reduced the frequency of bone survey tests from once every 3 months to once every 6 months during the study. The fourth amendment reduced the sample size from a total of 705 patients to a total of 423 patients.

### **Additional details on blinding**

Patients in the q12 weeks treatment arm received placebo infusions between active drug doses to maintain the blinding.

### **Additional details on study design amendment and sample size calculation**

The study was designed to include a placebo arm, with a randomization ratio of 2:2:1 for zoledronic acid q4 weeks, q12 weeks and placebo arms, respectively. Consequently, 13 patients were randomly assigned to the placebo arm. Subsequently, with the approval of bisphosphonates, the placebo arm was dropped. All patients who were randomly assigned to the placebo arm were switched to zoledronic acid every 4 weeks; their efficacy data were analyzed separately and were not reported in this paper. Analysis was done at 52 weeks, with treatment duration of 48 weeks.

No SRE data from the second year of treatment with zoledronic acid versus placebo was available at the time of designing this trial. Eventually, the data from the ZOOM trial, which had a similar trial design, reported a SRE incidence which was much lower than the assumed SRE incidence in the OPTIMIZE-2 protocol. Hence, the pooled blinded SRE rate in OPTIMIZE-2 was evaluated at a data cut-off date of December 10, 2010. The pooled SRE rate was 21%, which was substantially lower than the previous SRE rate assumption (48%). The sample size was re-estimated with no change to the statistical requirements (type I error, type II error, and the non-inferiority margin). The new revised sample size was 206 patients per treatment arm plus 11 patients who were assigned to the placebo arm (total N = 423) with an allocation ratio of 1:1.

### **Additional statistical analysis methodology**

At the time this study was designed, no data was available from trials that had randomized patients (who had been pre-treated for one year) into placebo versus continuation of zoledronic acid. The 10% non-inferiority margin as well as the sample size was therefore determined, based on SRE rate data from the first year of treatment. For the sample size, an SRE rate of 48% in the q4 weeks was assumed, and the initial sample size of OPTIMIZE-2 was calculated to be N = 705. While OPTIMIZE-2 was ongoing, data from the ZOOM study became available, and the overall pooled SRE rate (15%) was much lower than expected. A blinded look at the pooled SRE data of OPTIMIZE-2 was conducted and showed the rate of 21%. Based on this lower SRE rate, the sample-size of OPTIMIZE-2 was re-estimated to N = 423 (including the 13 patients who had initially been randomized to placebo, for whom the results are not reported in this paper. This new sample size had a power of 80% to detect the non-inferiority with the non-inferiority margin of ten, with one-sided 5% significance level. However, a decision was made to use the one-sided 2.5% significance level for the analysis i.e. to use the two-sided 95% confidence interval for the SRE rate difference to compare with the non-inferiority margin.

**Additional details on assays used for bone marker assessments**

uNTX was measured by the Vitros ECI system (Ortho Clinical Diagnostics), using a CLIA (ChemiLuminescent ImmunoAssay) method and BSAP was measured by the Access Immunoassay system (Beckman Coulter) using a CLIA method.

**eMaterial.** List of Independent Ethics Committees (IECs) or Institutional Review Boards (IRBs) by Study Center

| <b>Center No.</b> | <b>Ethics Committee or Institutional Review Board</b>           | <b>Department/Organization</b>                                                  | <b>City, State/Province, Postal Code</b> | <b>Country</b> |
|-------------------|-----------------------------------------------------------------|---------------------------------------------------------------------------------|------------------------------------------|----------------|
| 0501              | McLaren Regional Medical Center, IRB                            | McLaren Regional Medical Center                                                 | Flint, MI 48532                          | USA            |
| 0504              | Sterling Institutional Review Board                             | Highlands Oncology Group                                                        | Atlanta, GA 30339                        | USA            |
| 0506              | Sterling Institutional Review Board                             | Wilshire Oncology Medical Group, Inc                                            | Atlanta, GA 30339                        | USA            |
| 0510              | Sterling Institutional Review Board                             | Gabrail Cancer Center                                                           | Atlanta, GA 30339                        | USA            |
| 0511              | Sterling Institutional Review Board                             | Florida Cancer Specialists                                                      | Atlanta, GA 30339                        | USA            |
| 0512              | Sterling Institutional Review Board                             | Clintell, Inc                                                                   | Atlanta, GA 30339                        | USA            |
| 0514              | Sterling Institutional Review Board                             | Bay Area Cancer Research Group, LLC                                             | Atlanta, GA 30339                        | USA            |
| 0515              | Western Institutional Review Board                              | South Texas Oncology and Hematology, PA                                         | Olympia, WA 98502                        | USA            |
| 0517              | Main Line Hospitals Institutional Review Board                  | Lankenau Hospital                                                               | Wynnewod, PA 19096                       | USA            |
| 0521              | Sterling Institutional Review Board                             | Southwest Oncology Associates                                                   | Atlanta, GA 30339                        | USA            |
| 0522              | Sterling Institutional Review Board                             | Southbay Oncology Hematology Partners                                           | Atlanta, GA 30339                        | USA            |
| 0525              | Sterling Institutional Review Board                             | Ventura County Hematology-Oncology Specialists                                  | Atlanta, GA 30339                        | USA            |
| 0531              | St Luke's Hospital Duluth IRB #1                                | St Luke's Hospital Association of Duluth, Inc                                   | Duluth, MN 55805                         | USA            |
| 0532              | Western Institutional Review Board                              | Providence Everett Medical Center                                               | Olympia, WA 98502                        | USA            |
| 0533              | CHRISTUS St Frances Cabrini Hospital Institutional Review Board | CHRISTUS St FrancesCabrini Hospital                                             | Alexandria, LA 71301                     | USA            |
| 0537              | Sterling Institutional Review Board                             | Capitol Comprehensive Cancer Care Clinic                                        | Atlanta, GA 30339                        | USA            |
| 0538              | Sterling Institutional Review Board                             | Hematology Oncology Consultants, Inc                                            | Atlanta, GA 30339                        | USA            |
| 0541              | Human Research Protections Office                               | University of Maryland Greenebaum Cancer Center                                 | Baltimore, MD 21201                      | USA            |
| 0542              | Sterling Institutional Review Board                             | Cotton-O'Neil Cancer Center                                                     | Atlanta, GA 30339                        | USA            |
| 0544              | St Joseph's Mercy Health Center IRB                             | St Joseph's Mercy Clinic                                                        | Hot Springs, AR 71913                    | USA            |
| 0547              | St Barnabas Medical Center Institutional Review Board           | St Barnabas Medical Center                                                      | Livingston, NJ 07039                     | USA            |
| 0549              | Sterling Institutional Review Board                             | Medical Oncology Care Associates                                                | Atlanta, GA 30339                        | USA            |
| 0552              | Research Subject's Protection Program                           | Institutional Review Board: Human Subjects Committee Fairview Southdale Medical | Minneapolis, MN 55420                    | USA            |

|      |                                                                          |                                                                            |                         |     |
|------|--------------------------------------------------------------------------|----------------------------------------------------------------------------|-------------------------|-----|
|      |                                                                          | Oncology                                                                   |                         |     |
| 0553 | Sterling Institutional Review Board                                      | Magee-Women's Hospital                                                     | Atlanta, GA 30339       | USA |
| 0554 | Western Institutional Review Board                                       | Cancer Care Center, Inc                                                    | Olympia, WA 98502       | USA |
| 0556 | Sterling Institutional Review Board                                      | Lancaster Cancer Center, Ltd                                               | Atlanta, GA 30339       | USA |
| 0557 | Sterling Institutional Review Board                                      | Eastern Connecticut Hematology and Oncology Associates                     | Atlanta, GA 30339       | USA |
| 0558 | Sterling Institutional Review Board                                      | Cancer Care Centers of South Texas                                         | Atlanta, GA 30339       | USA |
| 0562 | Western Institutional Review Board                                       | HUX Cancer Center                                                          | Olympia, WA 98508       | USA |
| 0563 | Sterling Institutional Review Board                                      | Kentucky Cancer Clinic                                                     | Atlanta, GA 30339       | USA |
| 0566 | Sterling Institutional Review Board                                      | Investigative Clinical Research of Indiana, LLC                            | Atlanta, GA 30339       | USA |
| 0570 | Sterling Institutional Review Board                                      | Santee Hematology/Oncology                                                 | Atlanta, GA 30339       | USA |
| 0571 | Siouxland Institutional Review Board                                     | Siouxland Hematology-Oncology Associates, LLP                              | Sioux City, IA 51101    | USA |
| 0572 | Wayne State University IRB                                               | Karmanos Cancer Institute                                                  | Detroit, MI 48201       | USA |
| 0573 | Committee for the Protection of Human Subjects in Research               | St Peter's University Hospital Somerset Hematology Oncology Associates, PA | New Brunswick, NJ 08901 | USA |
| 0575 | Guthrie Healthcare Institutional Review Board                            | Robert Packer Hospital                                                     | Sayre, PA 18840         | USA |
| 0576 | Research Subjects' Protection Program University of Minnesota            | University of Minnesota Medical Center                                     | Minneapolis, MN 55455   | USA |
| 0577 | Sterling Institutional Review Board                                      | Cancer Center of Kansas                                                    | Atlanta, GA 30339       | USA |
| 0578 | Frederick Memorial Hospital Healthcare System, IRB                       | Frederick Memorial Hospital                                                | Frederick, MD 21701     | USA |
| 0583 | Sterling Institutional Review Board                                      | Barberton Citizens Hospital Cancer Center                                  | Atlanta, GA 30339       | USA |
| 0585 | Sterling Institutional Review Board                                      | Ohio Cancer Specialists, Inc                                               | Atlanta, GA 30339       | USA |
| 0587 | Sterling Institutional Review Board                                      | Arena Oncology Associates, PC                                              | Atlanta, GA 30339       | USA |
| 0590 | Western Institutional Review Board                                       | Anchorage Oncology Centre                                                  | Puyallup, WA 98374      | USA |
| 0591 | Caritas St Elizabeth's Medical Center Institutional Review Board, HOQ326 | Caritas Holy Family Hospital                                               | Boston, MA 02135        | USA |
| 0593 | Baptist Medical Center Institutional Review Board                        | Baptist Cancer Institute                                                   | Jacksonville, FL 32207  | USA |
| 0594 | Sterling Institutional Review Board                                      | Oncology Care Associates, PLLC                                             | Atlanta, GA 30339       | USA |
| 0596 | COMIRB/UCDHSC, MS F490 DHMC                                              | Hematology/Oncology                                                        | Aurora, CO 80045        | USA |

|      |                                                                                      |                                                                           |                       |     |
|------|--------------------------------------------------------------------------------------|---------------------------------------------------------------------------|-----------------------|-----|
| 0598 | Research Institute NorthShore University HealthSystem                                | Evanston Hospital                                                         | Evanston, IL 60201    | USA |
| 0601 | Sterling Institutional Review Board                                                  | Center for Cancer and Blood Disorders                                     | Atlanta, GA 30339     | USA |
| 0604 | Sterling Institutional Review Board                                                  | Jackson Oncology Associates                                               | Atlanta, GA 30339     | USA |
| 0607 | Sterling Institutional Review Board                                                  | Nevada Cancer Centers                                                     | Atlanta, GA 30339     | USA |
| 0611 | Sterling Institutional Review Board                                                  | The Corvallis Clinic, PC                                                  | Atlanta, GA 30339     | USA |
| 0612 | Sterling Institutional Review Board                                                  | Nebraska Hematology-Oncology, PC                                          | Atlanta, GA 30339     | USA |
| 0613 | Human Subjects Review Committee University of California, Davis                      | University of California, Davis Medical Center                            | Sacramento, CA 95817  | USA |
| 0614 | Sterling Institutional Review Board                                                  | Gwinnett Hospital System, Inc dba The Center for Cancer                   |                       |     |
| Care | Atlanta, GA 30339                                                                    | USA                                                                       |                       |     |
| 0615 | The University of Texas MD Anderson Cancer Center Institutional Review Board Box 198 | The University of Texas MD Anderson Cancer Center                         | Houston, TX 77030     | USA |
| 0617 | Sterling Institutional Review Board                                                  | Pacific Coast Hematology/Oncology Medical Group, Inc                      | Atlanta, GA 30339     | USA |
| 0618 | Sterling Institutional Review Board                                                  | Metropolitan Hematology/Oncology Medical Group                            | Atlanta, GA 30339     | USA |
| 0619 | Sterling Institutional Review Board                                                  | Pacific Cancer Medical Center, Inc                                        | Atlanta, GA 30339     | USA |
| 0620 | Alamance Regional Medical Center IRB                                                 | Alamance Regional Medical Center and Cancer Center                        | Burlington, NC 27215  | USA |
| 0622 | MedStar Research Institute Georgetown University Oncology Institutional Review Board | Georgetown University Medical Center Lombardi Comprehensive Cancer Center | Washington, DC 20057  | USA |
| 0623 | Sterling Institutional Review Board                                                  | Kansas City Cancer Center, LLC                                            | Atlanta, GA 30339     | USA |
| 0626 | Edward Hospital IRB                                                                  | Edward Cancer Center                                                      | Naperville, IL 60540  | USA |
| 0635 | North Memorial Health Care Institutional Review Board                                | Hubert H Humphrey Cancer Center                                           | Robbinsdale, MN 55422 | USA |
| 0638 | Sterling Institutional Review Board                                                  | North Valley Hematology/Oncology Medical Care Center                      | Atlanta, GA 30339     | USA |
| 0642 | University of Michigan Institutional Review Board IRBMED                             | University of Michigan Comprehensive Cancer Center                        | Ann Arbor, MI 48109   | USA |
| 0651 | Sterling Institutional Review Board                                                  | Desert Cancer Care, Inc                                                   | Atlanta, GA 30339     | USA |
| 0653 | Sterling Institutional                                                               | Hudson Valley Oncology,                                                   | Atlanta, GA           | USA |

|      |                                                                                                                  |                                                      |                      |     |
|------|------------------------------------------------------------------------------------------------------------------|------------------------------------------------------|----------------------|-----|
|      | Review Board                                                                                                     | PC                                                   | 30339                |     |
| 0657 | Sterling Institutional Review Board                                                                              | Francisco Gonzalez, MD, PA                           | Atlanta, GA 30339    | USA |
| 0659 | Sterling Institutional Review Board                                                                              | Advanced Oncology Associates                         | Atlanta, GA 30339    | USA |
| 0660 | Institutional Review Board Beth Israel Medical Center                                                            | Beth Israel Medical Center                           | New York, NY 10038   | USA |
| 0662 | Penn State College of Medicine Penn State Milton S Hershey Medical Center Human Subjects Protection Office, A115 | Penn State Milton S Hershey Medical Center           | Hershey, PA 17033    | USA |
| 0664 | MedStar Research Institute Georgetown University Oncology Institutional Review Board                             | Harry and Jeanette Weinberg Cancer Institute         | Washington, DC 20057 | USA |
| 0671 | Sterling Institutional Review Board                                                                              | Swarna S Chanduri, MD                                | Atlanta, GA 30339    | USA |
| 0673 | CHS Institutional Review Board                                                                                   | NorthEast Oncology Associates                        |                      |     |
|      | Concord, NC 28025                                                                                                | USA                                                  |                      |     |
| 0677 | Western IRB                                                                                                      | University of Iowa Hospitals and Clinics             | Olympia, WA 98502    | USA |
| 0678 | Sterling Institutional Review Board                                                                              | Regional Cancer Care Associates Cherry Hill Division | Atlanta, GA 30339    | USA |
| 0679 | Memorial Sloan-Kettering Cancer Center Institutional Review Board                                                | Memorial Sloan-Kettering Cancer Center               | New York, NY 10021   | USA |
| 0680 | Sterling Institutional Review Board                                                                              | Davood Vafai, MD                                     | Atlanta, GA 30339    | USA |
| 0681 | Office for the Protection of Research Subjects IRB                                                               | Northwestern University                              | Chicago, IL 60611    | USA |
| 0682 | Sterling Institutional Review Board                                                                              | Trilogy Cancer Center                                | Atlanta, GA 30339    | USA |
| 0683 | Froedtert and Medical College of Wisconsin IRB                                                                   | Froedtert and Medical College of Wisconsin           | Milwaukee, WI 53226  | USA |
| 0687 | Henry Ford Health System Institutional Review Board                                                              | Henry Ford Health System                             | Detroit, MI 48202    | USA |
| 0690 | Sterling Institutional Review Board                                                                              | Florida Cancer Research Institute                    | Atlanta, GA 30339    | USA |
| 0692 | Sterling Institutional Review Board                                                                              | Rockwood Clinic, PS                                  | Atlanta, GA 30339    | USA |
| 0693 | Sterling Institutional Review Board                                                                              | St Agnes HealthCare, Inc                             | Atlanta, GA 30339    | USA |
| 0695 | Western IRB                                                                                                      | University of Rochester Medical Center               | Olympia, WA 98508    | USA |
| 0698 | Columbus Regional Institutional Review Committee                                                                 | John B. Amos Cancer Center                           | Columbus, GA 31902   | USA |
| 0701 | Sterling Institutional Review Board                                                                              | United Cancer Specialists                            | Atlanta, GA 30339    | USA |

|      |                                                                                             |                                                                   |                         |     |
|------|---------------------------------------------------------------------------------------------|-------------------------------------------------------------------|-------------------------|-----|
| 0703 | Central Baptist Institutional Review Board                                                  | Central Baptist Hospital                                          | Lexington, KY<br>40503  | USA |
| 0704 | Sterling Institutional Review Board                                                         | Redwood Regional Medical Group                                    | Atlanta, GA<br>30339    | USA |
| 0705 | Sterling Institutional Review Board                                                         | Pacific Shores Medical Group                                      | Atlanta, GA<br>30339    | USA |
| 0708 | St John's Mercy Medical Center Institutional Review Board                                   | St John's Mercy Medical Center                                    | St Louis, MO<br>63141   | USA |
| 0709 | Bay Area Hospital IRB #1                                                                    | Bay Area Hospital                                                 | Coos Bay, OR<br>97420   | USA |
| 0710 | Fred Hutchinson Cancer Research Center IRB                                                  | Seattle Cancer Center Alliance                                    | Seattle, WA<br>98109    | USA |
| 0711 | UT Southwestern Medical Center Institutional Review Board                                   | UT Southwestern Medical Center                                    | Dallas, TX<br>75390     | USA |
| 0714 | MedStar Health Research Institute Georgetown University Oncology Institutional Review Board | Washington Cancer Institute at MedStar Washington Hospital Center | Washington, DC<br>20057 | USA |
| 0715 | OV-UCLA Education and Research Institute                                                    | Olive View UCLA Medical Center                                    | Sylmar, CA<br>91342     | USA |
| 0717 | Sterling Institutional Review Board                                                         | Medical Associates Clinic, PC                                     | Atlanta, GA<br>30339    | USA |
| 0718 | Sterling Institutional Review Board                                                         | Cedar Valley Medical Specialists, PC                              | Atlanta, GA<br>30339    | USA |
| 0720 | Summa Health System IRB                                                                     | Summa Health System                                               | Akron, OH<br>44304      | USA |
| 0723 | Columbia University IRB                                                                     | Columbia University Medical Center                                | New York, NY<br>10032   | USA |



## **eResults.** Additional Details of the Study Results

### **Additional demographic and baseline data**

The majority of patients were Caucasians (88%), with a mean age of 59 years. The mean baseline composite pain score was comparable between the q4 weeks group 2.03 (1.90) and the q12 weeks group 2.22 (2.09). Prior to the study, the majority of patients had been treated with IV bisphosphonates for more than 15 months (n = 226 [54.3%]) and had a uNTX/Cr level of less than 100 nmol BCE/mmol creatinine (n = 405 [97.4%]).

### **Additional details on cardiac adverse events**

One patient in q4 weeks group and two patients in q12 weeks group experienced cardiac ischemic events. One patient in q4 weeks group and two patients in q12 weeks group experienced an atrial fibrillation TEAE.

**eTable 1. Number of Infusions Before the Study**

|                                                    | <b>Zoledronic acid<br/>every 4 weeks<br/>(n = 198)</b> | <b>Zoledronic acid<br/>every 12 weeks<br/>(n = 202)</b> |
|----------------------------------------------------|--------------------------------------------------------|---------------------------------------------------------|
| Number of zoledronic acid infusions prior to study |                                                        |                                                         |
| N                                                  | 194                                                    | 200                                                     |
| Mean (SD)                                          | 20.6 (14.02)                                           | 18.8 (12.29)                                            |
| Median                                             | 15.0                                                   | 14.0                                                    |
| Min, Max                                           | 1, 80                                                  | 1, 74                                                   |
| Number of pamidronate infusions prior to study     |                                                        |                                                         |
| N                                                  | 15                                                     | 11                                                      |
| Mean (SD)                                          | 12.3 (10.07)                                           | 22.6 (27.30)                                            |
| Median                                             | 11.0                                                   | 13.0                                                    |
| Min, Max                                           | 1, 35                                                  | 1, 93                                                   |

SD= standard deviation

**eTable 2. Renal Adverse Events**

|                                                          | <b>Zoledronic acid<br/>every 4 weeks<br/>(n = 198)</b> | <b>Zoledronic acid<br/>every 12 weeks<br/>(n = 202)</b> |
|----------------------------------------------------------|--------------------------------------------------------|---------------------------------------------------------|
| Number of patients with at least one renal adverse event | 19 (9.6%)                                              | 16 (7.9%)                                               |
| Investigations                                           | 17 (8.6%)                                              | 8 (4.0%)                                                |
| Blood creatinine increased                               | 10 (5.1%)                                              | 4 (2.0%)                                                |
| Creatinine renal clearance decreased                     | 6 (3.0%)                                               | 5 (2.5%)                                                |
| Blood urea increased                                     | 3 (1.5%)                                               | 1 (0.5%)                                                |
| Creatinine renal clearance abnormal                      | 1 (0.5%)                                               | -                                                       |
| Glomerular filtration rate decreased                     | 1 (0.5%)                                               | -                                                       |
| Renal and urinary disorders                              | 2 (1.0%)                                               | 9 (4.5%)                                                |
| Renal failure                                            | 1 (0.5%)                                               | 5 (2.5%)                                                |
| Renal failure acute                                      | 1 (0.5%)                                               | 2 (1.0%)                                                |
| Azotaemia                                                | -                                                      | 1 (0.5%)                                                |
| Renal impairment                                         | -                                                      | 1 (0.5%)                                                |

**eTable 3. On-treatment Deaths**

| <b>Cause of death</b> | <b>Zoledronic acid every 4 weeks (n = 10)</b> | <b>Zoledronic acid every 12 weeks (n = 7)</b> | <b>Placebo/ zoledronic acid (n = 1)<sup>a</sup></b> | <b>Total (N = 18)</b> |
|-----------------------|-----------------------------------------------|-----------------------------------------------|-----------------------------------------------------|-----------------------|
| Metastatic disease    | 8                                             | 4                                             | 1                                                   | 13                    |
| Sepsis                | -                                             | 2                                             | -                                                   | 2                     |
| Multi-organ failure   | 1                                             | -                                             | -                                                   | 1                     |
| Liver failure         | 1                                             | -                                             | -                                                   | 1                     |
| Subdural hematoma     |                                               | 1                                             | -                                                   | 1                     |

<sup>a</sup>The study was designed to include a placebo arm, with a randomization ratio of 2:2:1 for zoledronic acid q4 weeks, q12 weeks and placebo arms, respectively. Consequently, 13 patients were randomly assigned to the placebo arm. Subsequently, with the approval of bisphosphonates, the placebo arm was dropped. All patients who were randomly assigned to the placebo arm were switched to zoledronic acid q4 weeks; their efficacy data were analyzed separately and were not reported in this paper.

**eFigure.** Change From Baseline in Bone Biomarker Levels

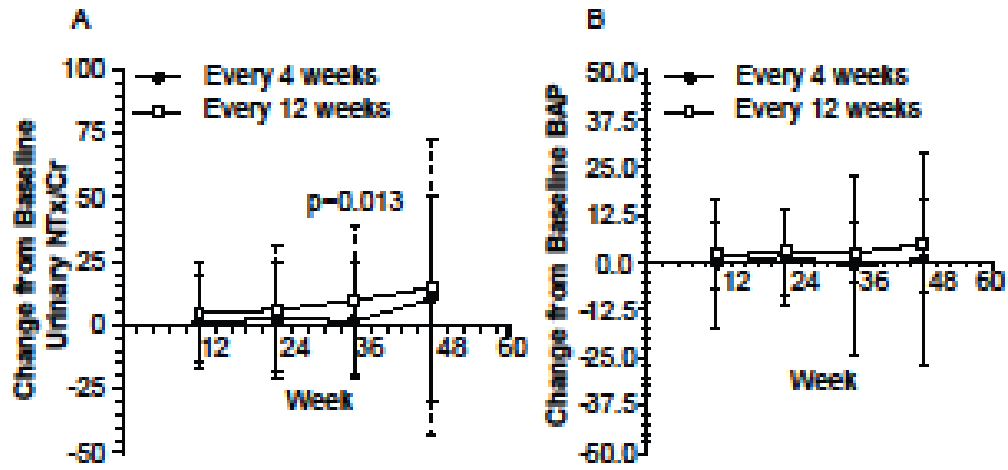

(A) Urinary N- telopeptide normalized for urinary creatinine (uNTX/Cr) and (B) serum bone-specific alkaline phosphatase (BAP).
